# Supplementary material for: Intermediate bands and p-orbital tuning of the band structure of BiFeO3 for photovoltaic application
Source: Royal Society of Chemistry journal article supplement (doi:10.1039/d4cp02948h), 2024-01-01
Supplement: d4cp02948h1.pdf [file d4cp02948h1.pdf]

## Supplementary Information

### Intermediate bands and p orbital tuning the band structure of BiFeO<sub>3</sub> for photovoltaic application

Xi Wang<sup>a</sup>, Sa Zhang<sup>a\*</sup>, Liang Qiao<sup>b</sup>, Li Ma<sup>a</sup> and Haiyan Xiao<sup>b</sup>

<sup>a</sup>*College of Mathematics and Physics, Chengdu University of Technology, Chengdu 610059, China;*

<sup>b</sup>*School of Physics, University of Electronic Science and Technology of China, Chengdu 611731, China*

---

#### Contents

|                                                                |           |
|----------------------------------------------------------------|-----------|
| <b>S1 Phonon spectrum of P4<sub>mm</sub> BiFeO<sub>3</sub></b> | <b>S2</b> |
| <b>S2 The input files of phonon calculation</b>                | <b>S3</b> |

---

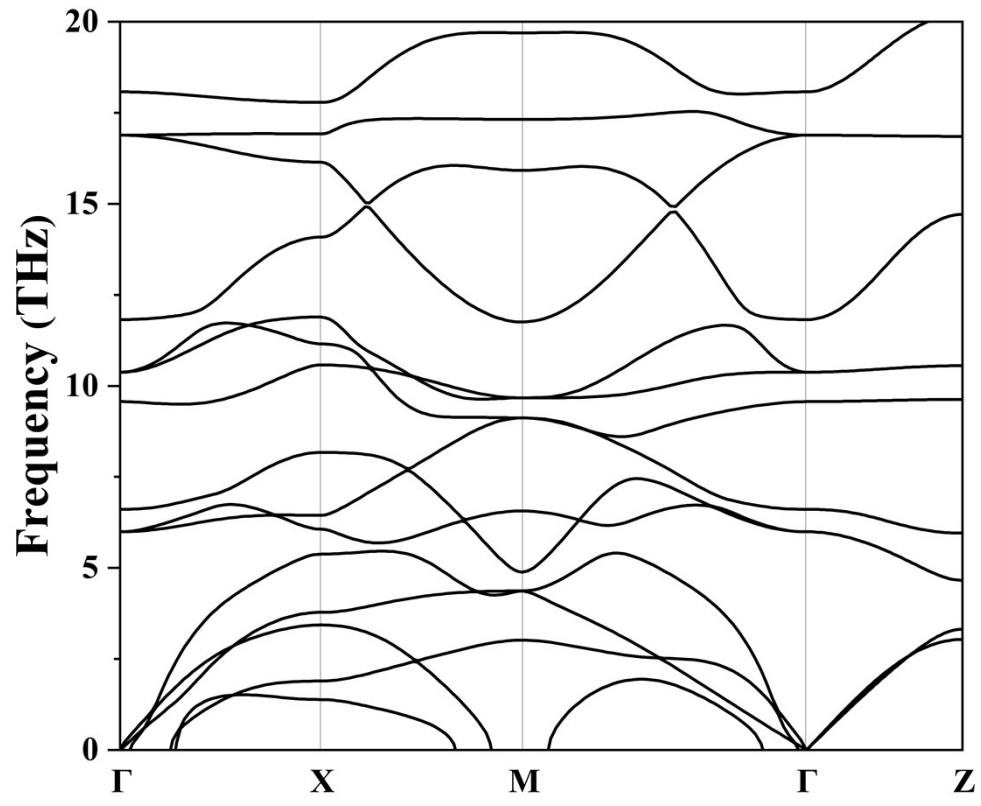

Fig. S1. Phonon spectrum of 80-atom  $2\times 2\times 1$   $P4mm$  BiFeO<sub>3</sub>.

The input files for phonon calculation of pure BFO include INCAR, KPOINTS, POSCAR, and POTCAR.

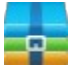

INCAR.zip

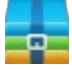

KPOINTS.zip

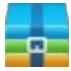

POSCAR.zip

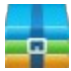

POTCAR.zip
